# Supplementary material for: Blue honeysuckle extracts retarded starch digestion by inhibiting glycosidases and changing the starch structure
Source: Royal Society of Chemistry journal article supplement (doi:10.1039/d2fo00459c), 2022-01-01
Supplement: d2fo00459c1.pdf [file d2fo00459c1.pdf]

## Supplementary information

**Table. S1** GI values of starch-BHE complexes and content of different types of starch.

| Sample         | RDS (%)                   | SDS (%)                   | RS (%)                    | GI                        |
|----------------|---------------------------|---------------------------|---------------------------|---------------------------|
| Normal starch  | 78.02 ± 0.45 <sup>a</sup> | 12.48 ± 0.44 <sup>c</sup> | 9.48 ± 0.44 <sup>c</sup>  | 74.63 ± 0.82 <sup>a</sup> |
| Starch-5% BHE  | 57.14 ± 0.15 <sup>b</sup> | 25.63 ± 0.61 <sup>b</sup> | 17.22 ± 0.23 <sup>b</sup> | 68.52 ± 0.36 <sup>b</sup> |
| Starch-10% BHE | 52.02 ± 0.51 <sup>c</sup> | 28.66 ± 0.75 <sup>a</sup> | 19.31 ± 0.74 <sup>a</sup> | 62.3 ± 0.41 <sup>c</sup>  |

Values were expressed as mean ± standard deviation.

Different superscripts in the same column represent significant differences at  $p < 0.05$ .

**Table. S2** Relative crystallinity and short-range order of starch-BHE complexes.

| Sample         | Relative crystallinity (%) | 1047/1022cm <sup>-1</sup> | 1022/995cm <sup>-1</sup> |
|----------------|----------------------------|---------------------------|--------------------------|
| Normal starch  | 34.30 ± 0.43 <sup>c</sup>  | 1.02 ± 0.07 <sup>a</sup>  | 1.01 ± 0.04 <sup>a</sup> |
| Starch-5% BHE  | 42.38 ± 0.13 <sup>b</sup>  | 1.08 ± 0.09 <sup>a</sup>  | 0.94 ± 0.06 <sup>a</sup> |
| Starch-10% BHE | 44.50 ± 0.26 <sup>a</sup>  | 1.12 ± 0.05 <sup>a</sup>  | 0.82 ± 0.03 <sup>a</sup> |

Values were expressed as mean ± standard deviation.

Different superscripts in the same column represent significant differences at  $p < 0.05$ .
